# Supplementary material for: Facile preparation of novel and active 2D nanosheets from non-layered and traditionally non-exfoliable earth-abundant materials
Source: Royal Society of Chemistry journal article supplement (doi:10.1039/c9ta04442f), 2019-01-01
Supplement: c9ta04442f1.pdf [file c9ta04442f1.pdf]

## *Supporting Information*

# **Facile Preparation of Novel and Active 2D Nanosheets from Non-layered and Traditionally Un-exfoliatable Earth-abundant Materials**

*Sheng Liu,<sup>†1,2</sup> Lei Xie,<sup>†2</sup> Hui Qian,<sup>3</sup> Guangyi Liu,<sup>\*1</sup> Hong Zhong,<sup>1</sup> and Hongbo Zeng<sup>\*2</sup>*

*<sup>1</sup>College of Chemistry and Chemical engineering, Central South University, Changsha, 410083, China*

*<sup>2</sup>Department of Chemical and Materials Engineering, University of Alberta, Edmonton, Alberta, T6G 1H9, Canada*

*<sup>3</sup>Nanotechnology Research Center, National Research Council, Edmonton, Alberta T6G 2M9, Canada*

*<sup>†</sup>Sheng Liu and Lei Xie contributed equally to this work.*

*\*Email: [hongbo.zeng@ualberta.ca](mailto:hongbo.zeng@ualberta.ca) (H. Zeng), Phone: +1-780-492-1044, Fax: +1-780-492-2881*

*\*Email: [guangyiliu@csu.edu.cn](mailto:guangyiliu@csu.edu.cn) (G. Liu)*

**CoOOH**

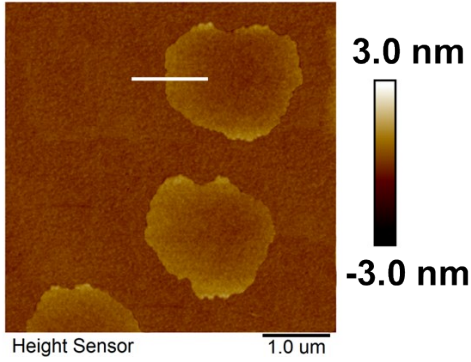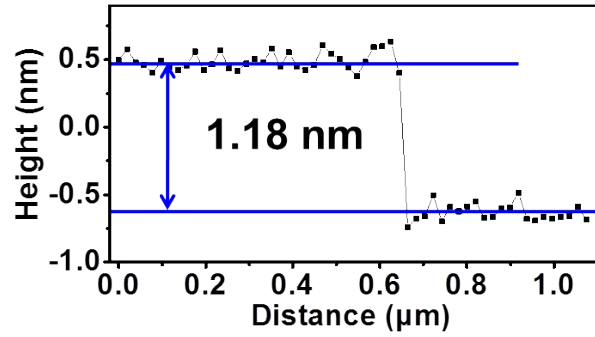

**TiO<sub>2</sub>**

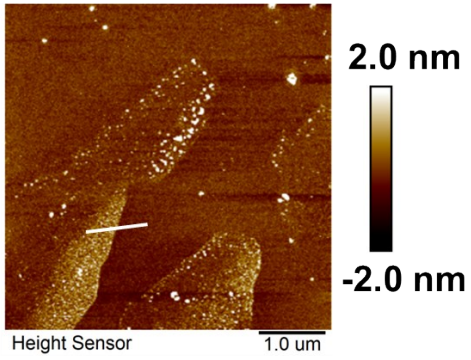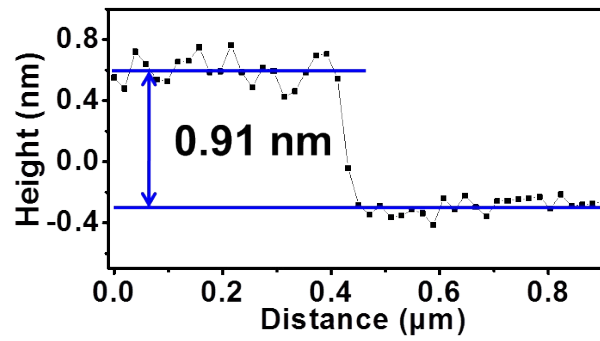

**ZnS**

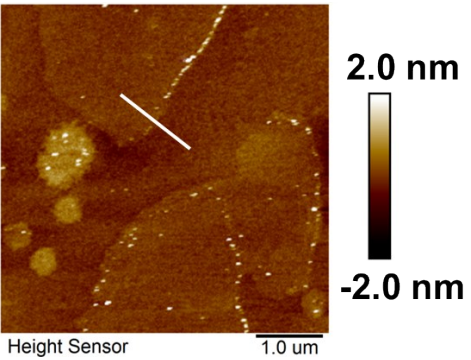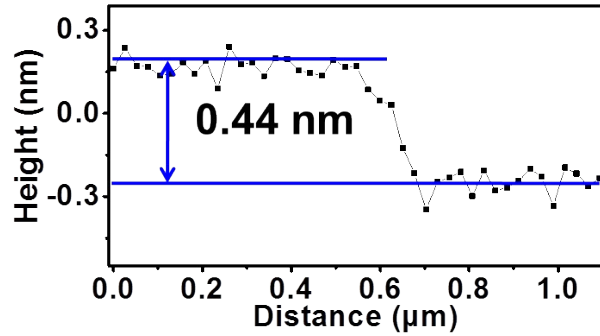

**NiS**

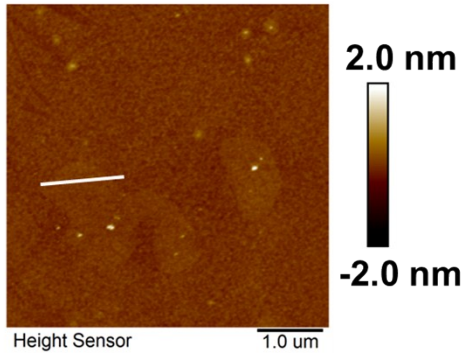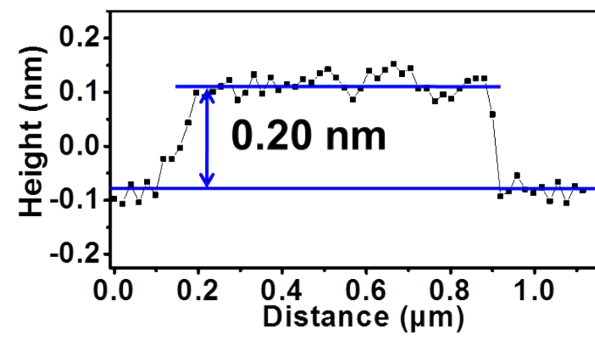

**ZnCO<sub>3</sub>**

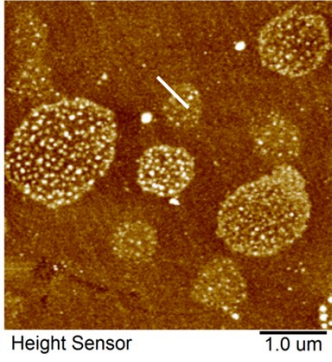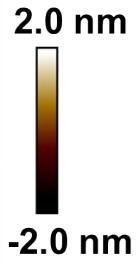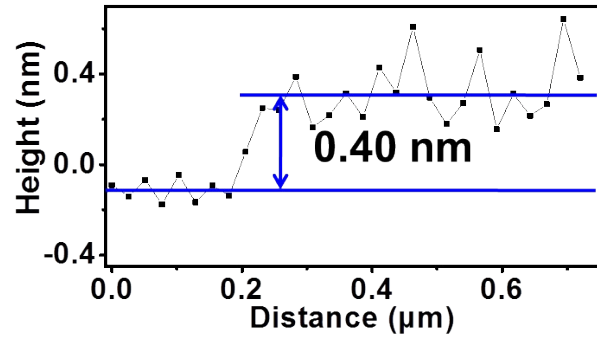

**MnCO<sub>3</sub>**

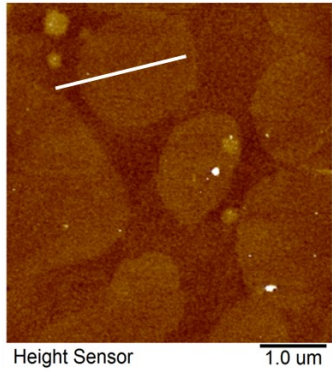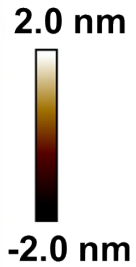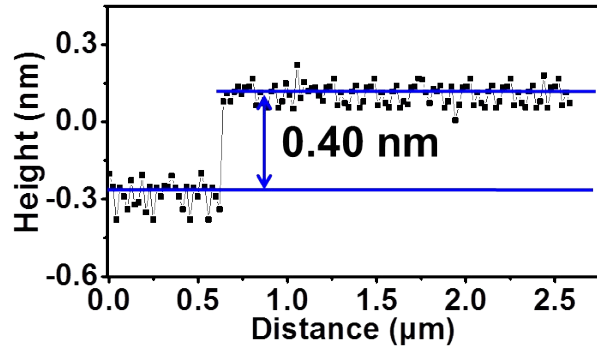

**FeCO<sub>3</sub>**

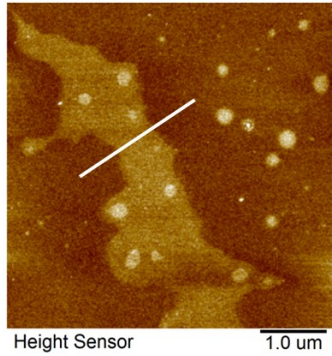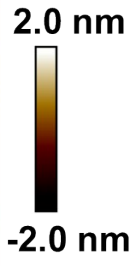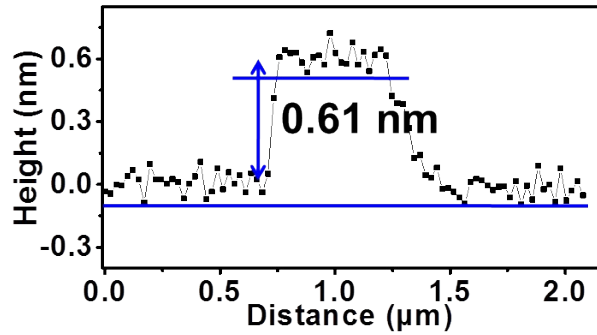

**PbCO<sub>3</sub>**

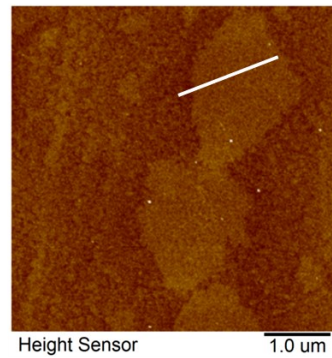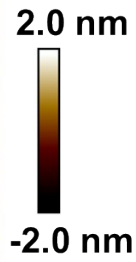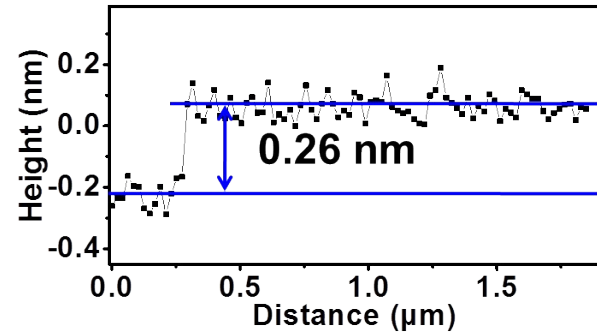

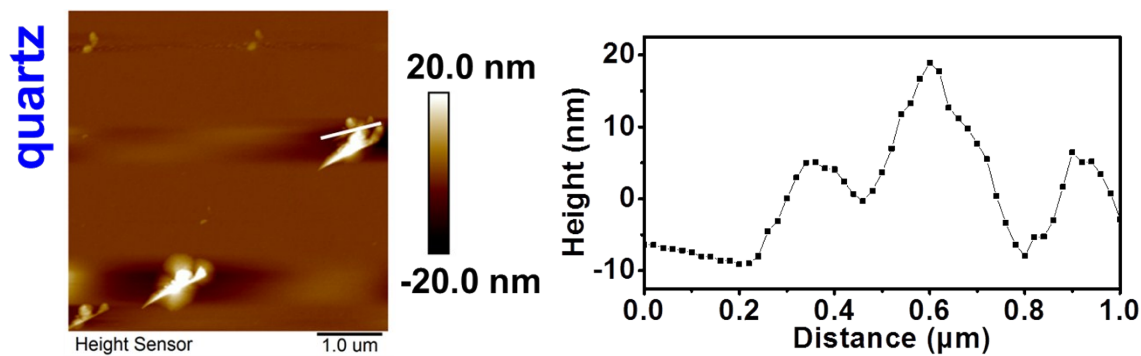

**Figure S1.** AFM topographic images ( $5 \times 5 \mu\text{m}^2$ ) and height profiles of the nanosheets exfoliated from non-layered oxides: CoOOH and  $\text{TiO}_2$ , sulfides: ZnS and NiS, and carbonates:  $\text{ZnCO}_3$ ,  $\text{MnCO}_3$ ,  $\text{FeCO}_3$  and  $\text{PbCO}_3$ , with cleavage planes. Quartz without any cleavage plane as the control experiment only shows irregular small particles.

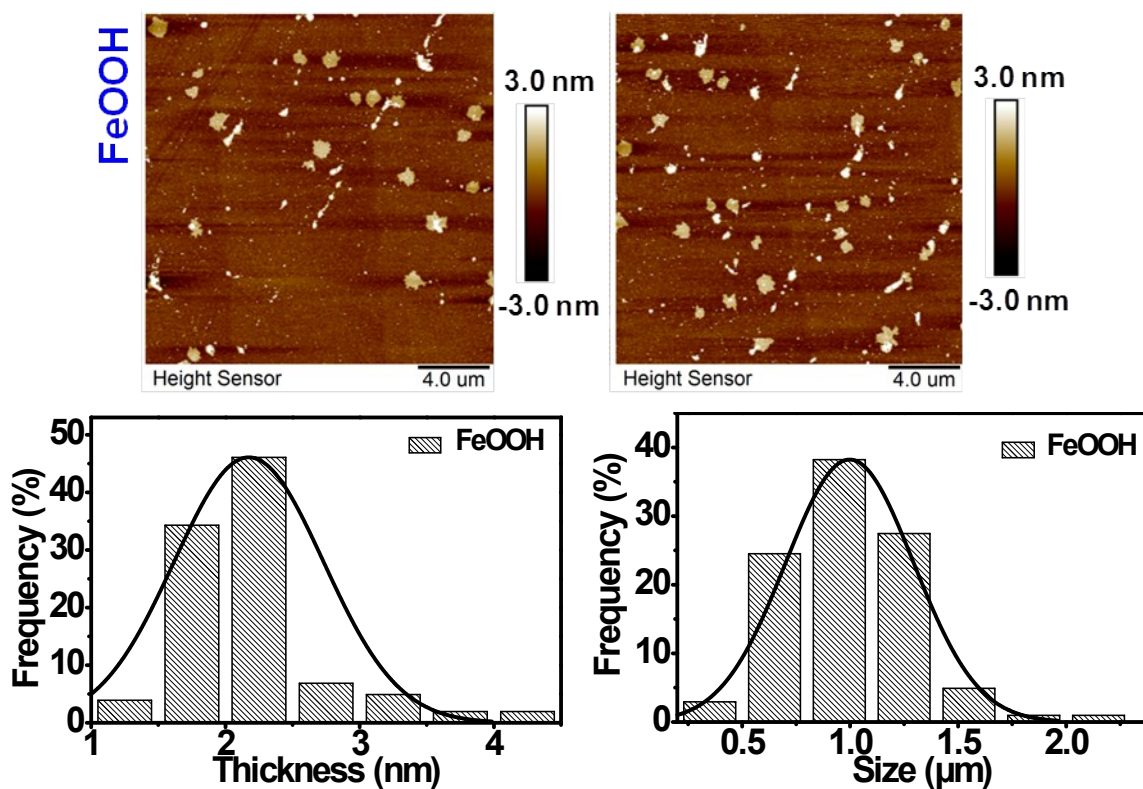

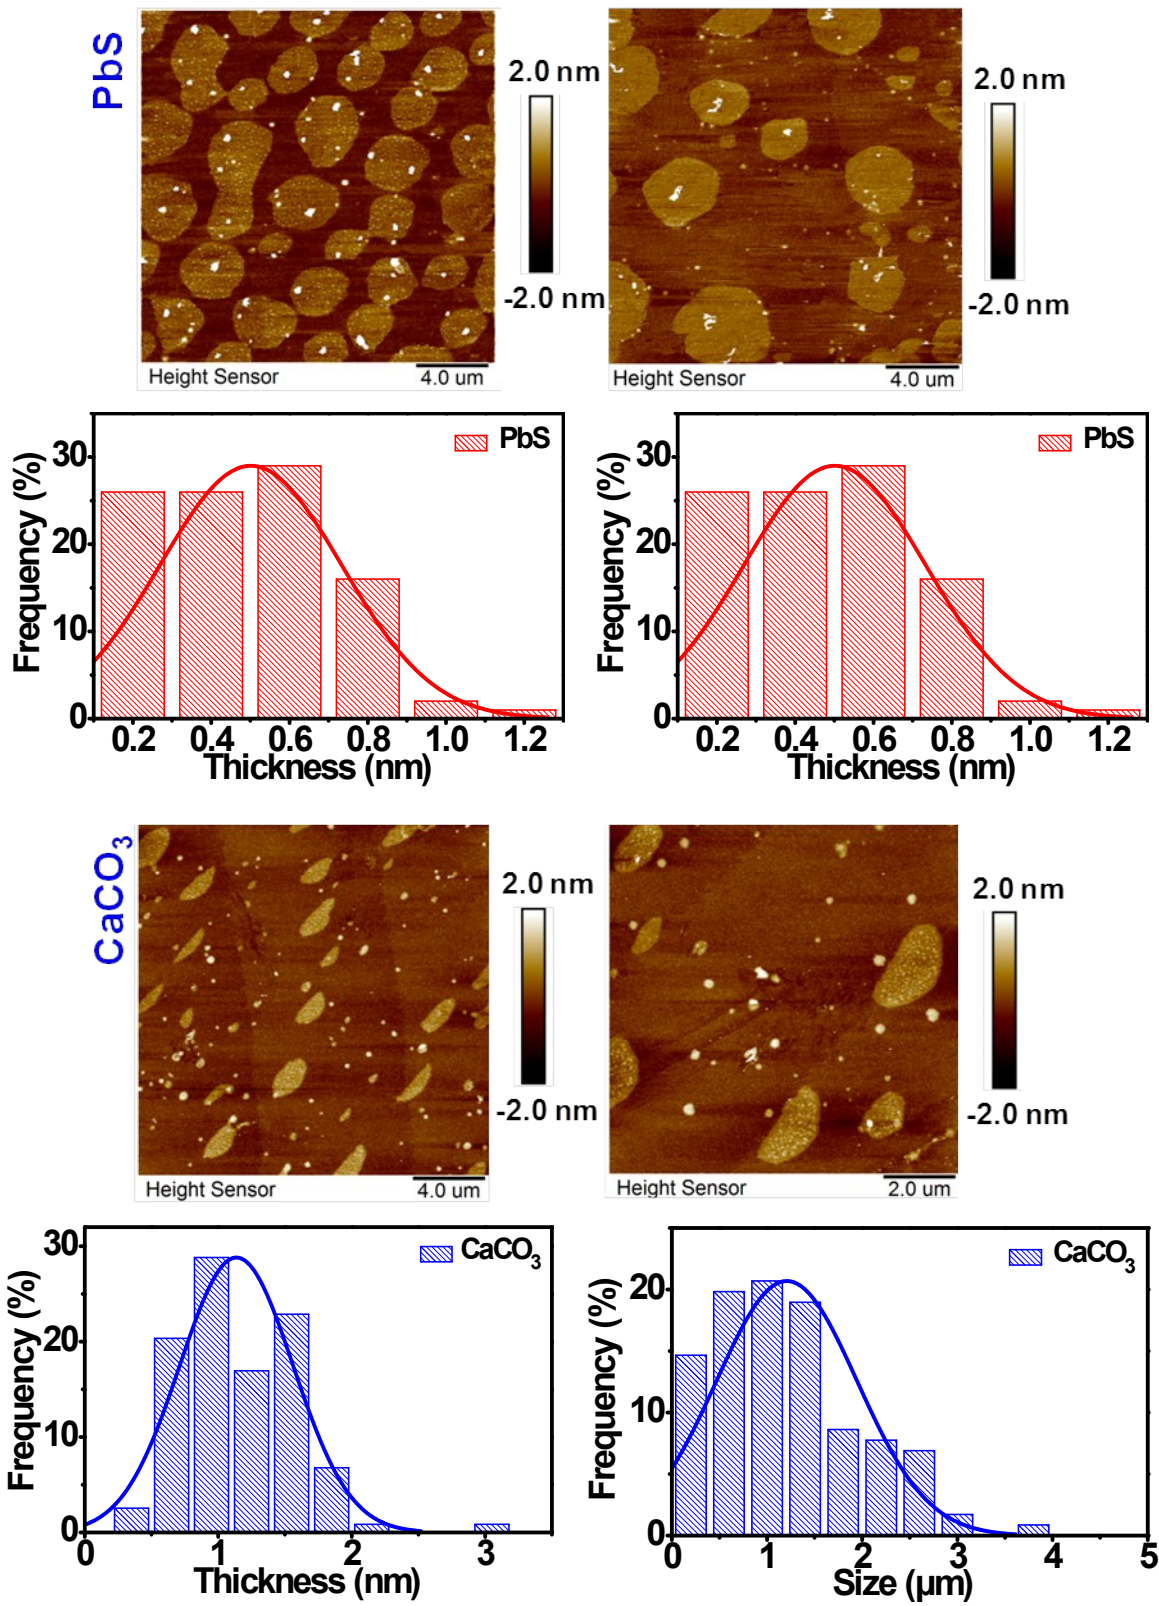

Figure S2. Typical AFM topographic images and distributions of thickness and size of  $\alpha$ -FeOOH, PbS and CaCO<sub>3</sub> nanosheets.

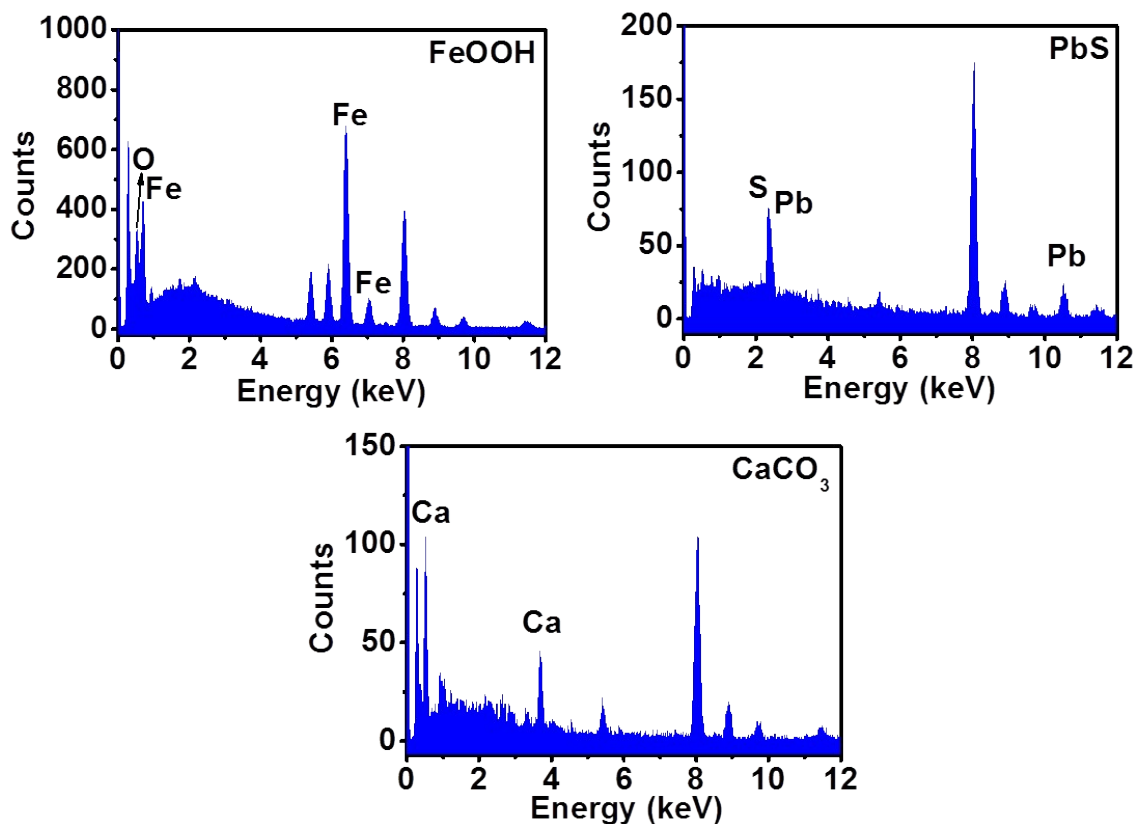

**Figure S3.** STEM-EDX analysis of  $\alpha$ -FeOOH, PbS and CaCO<sub>3</sub> nanosheets. STEM-EDX confirms the chemical composition of exfoliated nanosheets for TEM characterization to be  $\alpha$ -FeOOH, PbS and CaCO<sub>3</sub>, respectively, and the contamination originated from the Cu source of TEM grids is inevitable.

**Table S1.** Atomic concentration obtained from STEM-EDX analysis.

| Samples              | Atomic concentration (%) |      |      |      |      |      |
|----------------------|--------------------------|------|------|------|------|------|
|                      | Fe                       | O    | Pb   | S    | Ca   | C    |
| 2D FeOOH             | 31.5                     | 68.5 |      |      |      |      |
| 2D PbS               |                          |      | 48.3 | 51.7 |      |      |
| 2D CaCO <sub>3</sub> |                          | 59.1 |      |      | 17.1 | 23.8 |

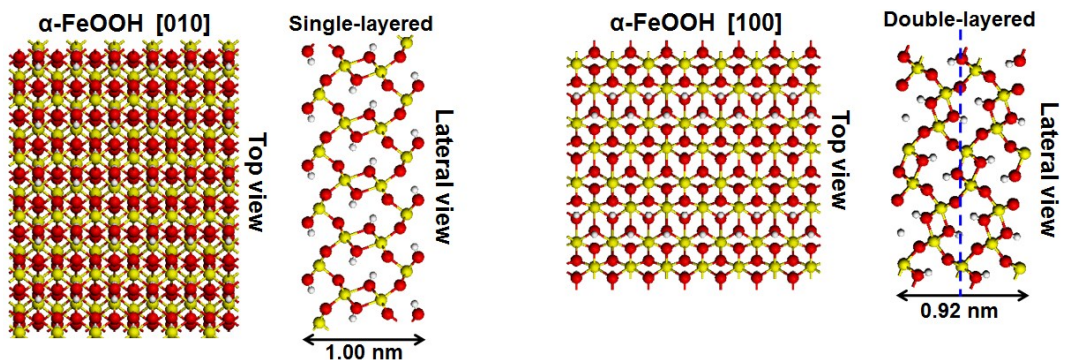

Figure S4. Atomic structures of  $\alpha$ -FeOOH (010) and (100) cleavage planes.

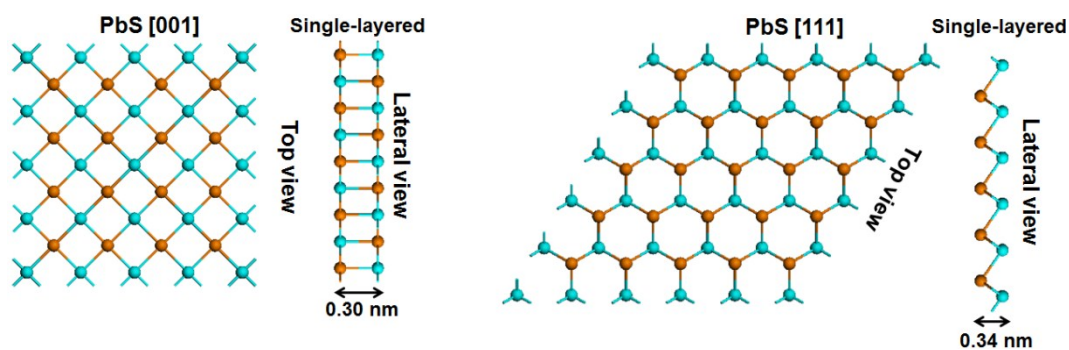

Figure S5. Atomic structures of PbS (001) and (111) cleavage planes.

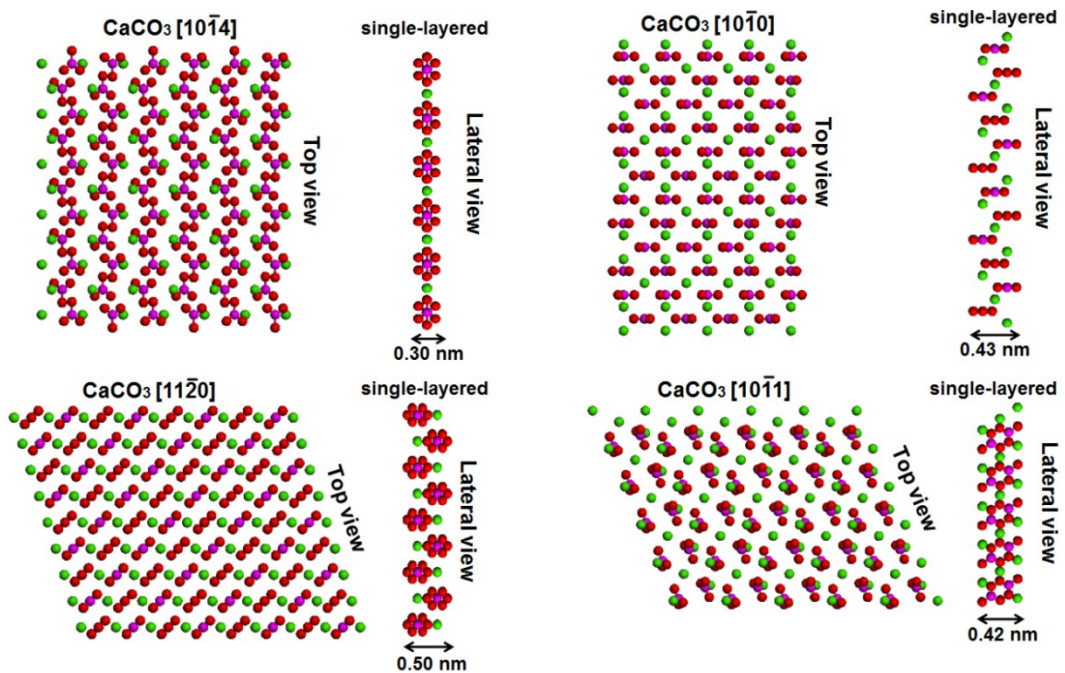

Figure S6. Atomic structures of  $\text{CaCO}_3$  ( $10\bar{1}4$ ), ( $10\bar{1}0$ ), ( $11\bar{2}0$ ) and ( $10\bar{1}1$ ) cleavage planes.

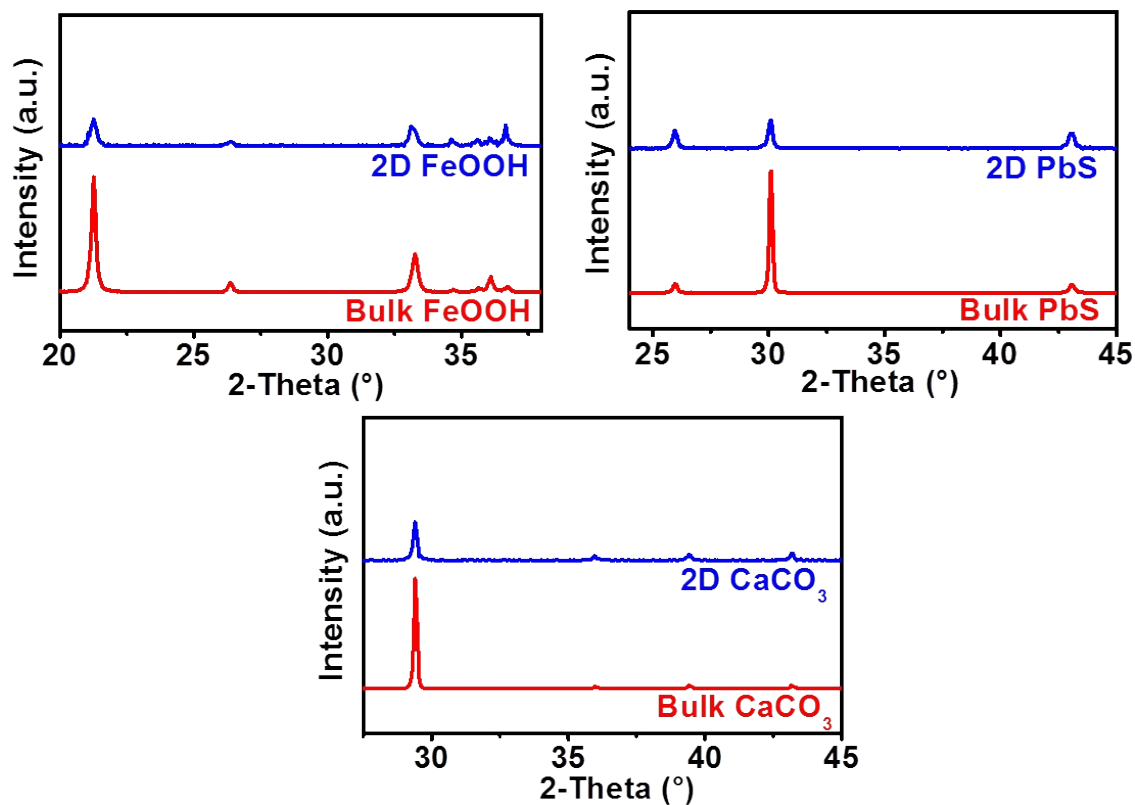

**Figure S7.** XRD of  $\alpha$ -FeOOH, PbS and CaCO<sub>3</sub> nanosheets and pristine powders. The zoomed-in figures clearly show the stronger and broadened peaks for 2D nanosheets.

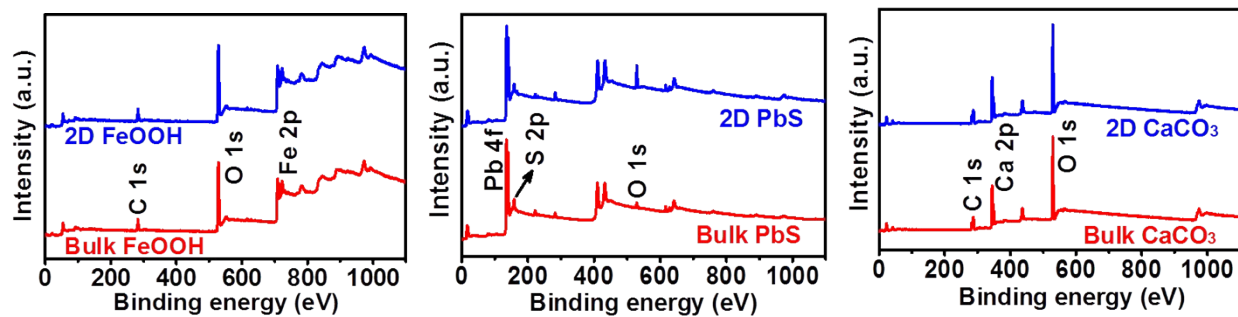

**Figure S8.** Survey scan XPS spectra of the exfoliated nanosheets and pristine powders of  $\alpha$ -FeOOH, PbS and CaCO<sub>3</sub>. Survey scan spectra confirm the purity of the exfoliated nanosheets and pristine powders since no impurity element was detected except the inevitable contamination of carbon and oxygen.



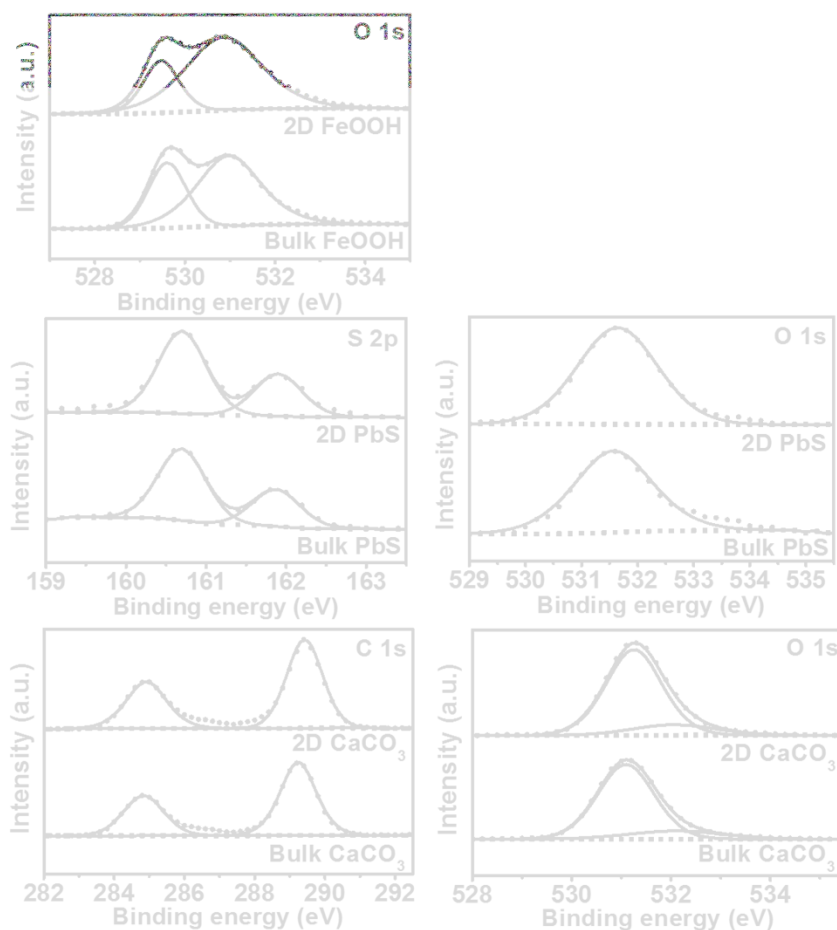

**Figure S9.** High-resolution XPS spectra of the exfoliated nanosheets and pristine powders of  $\alpha$ -FeOOH, PbS and CaCO<sub>3</sub>. It is noted that Fe 2p of  $\alpha$ -FeOOH, Pb 4f of PbS and Ca 2p of CaCO<sub>3</sub> are shown in Figure 3. High-resolution spectra show the pristine chemical state with no obvious variation for both 2D  $\alpha$ -FeOOH and 2D CaCO<sub>3</sub> while increased surface oxidation for 2D PbS.

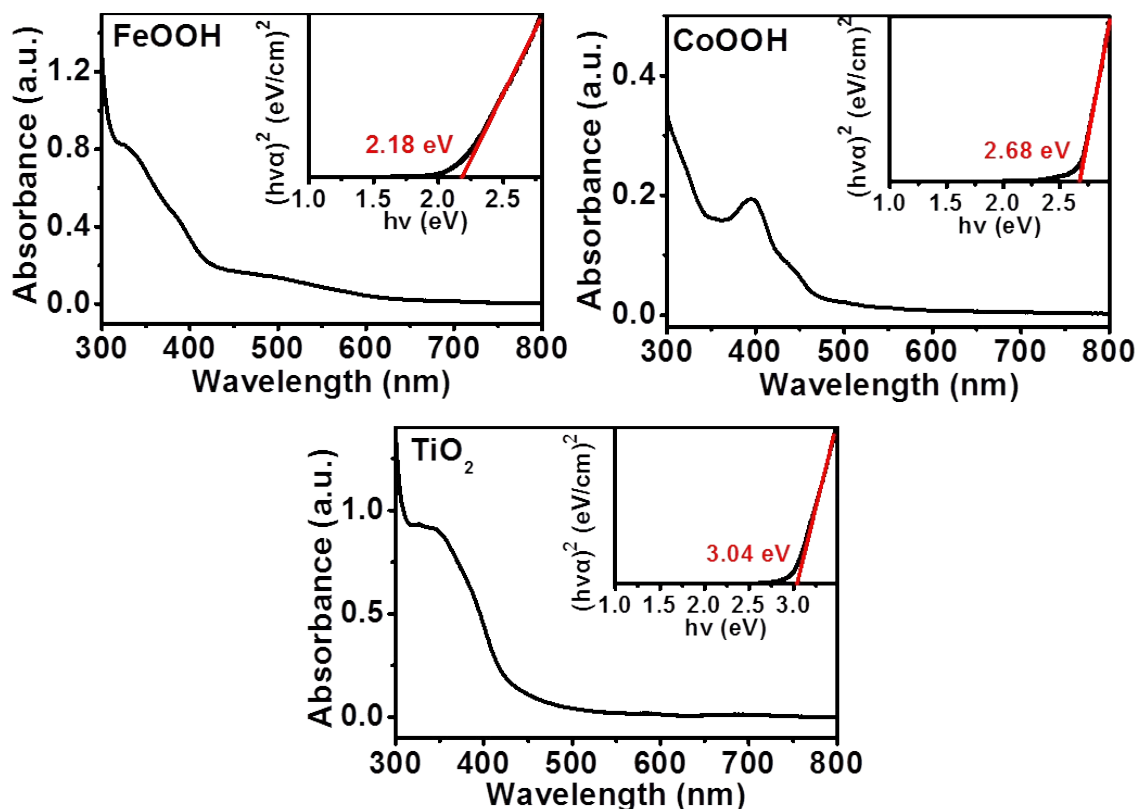

**Figure S10.** UV-vis absorption of  $\alpha$ -FeOOH, CoOOH and TiO<sub>2</sub> nanosheets in DMF with the calculated optical band gap (inset). In general, the materials with reduced size and dimension display raised conduction band and lowered valence band, thereby resulting in a blueshift of the absorption edge and increase in the band gap.

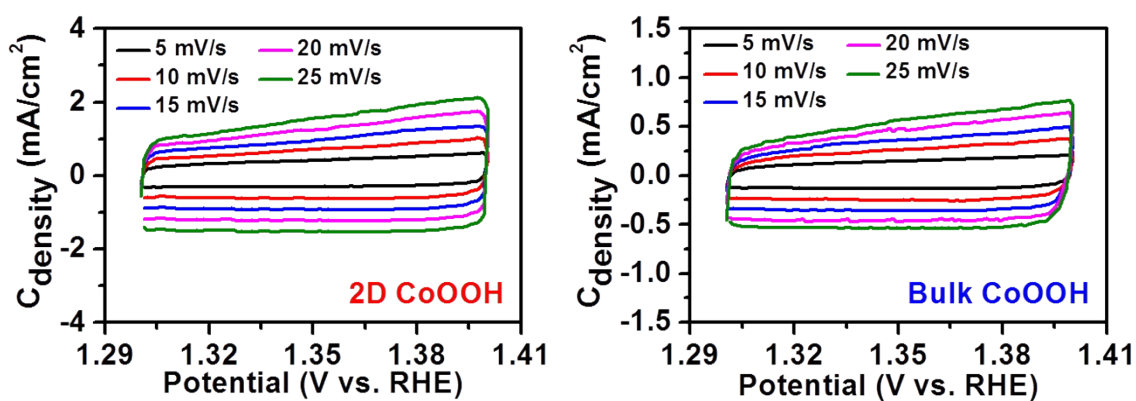

**Figure S11.** CV curves of 2D and bulk CoOOH at different scanning rates.

**Table S2.** Diffraction peaks of the XRD patterns.

| Materials         | Bulk                    |                  | nanosheets              |                  |
|-------------------|-------------------------|------------------|-------------------------|------------------|
|                   | Location (2-Theta ) (°) | Intensity (a.u.) | Location (2-Theta ) (°) | Intensity (a.u.) |
| $\alpha$ -FeOOH   | 17.85                   | 233              | 17.85                   | 32               |
|                   | 21.25                   | 1976             | 21.25                   | 204              |
|                   | 26.35                   | 169              | 26.35                   | 34               |
|                   | 33.25                   | 659              | 33.10                   | 138              |
|                   | 34.70                   | 40               | 34.60                   | 54               |
|                   | 35.65                   | 78               | 35.60                   | 48               |
|                   | 36.10                   | 271              | 36.05                   | 64               |
|                   | 36.70                   | 108              | 36.65                   | 162              |
|                   | 39.10                   | 58               |                         |                  |
|                   | 40.20                   | 58               | 40.15                   | 44               |
|                   | 41.20                   | 298              | 41.20                   | 70               |
|                   | 43.25                   | 32               |                         |                  |
|                   | 53.30                   | 61               | 53.20                   | 70               |
|                   | 54.15                   | 138              | 54.00                   | 88               |
|                   | 55.30                   | 50               |                         |                  |
|                   | 57.50                   | 36               | 57.45                   | 32               |
|                   | 59.05                   | 48               | 58.95                   | 50               |
|                   | 61.50                   | 68               | 61.25                   | 40               |
|                   | 63.40                   | 62               |                         |                  |
|                   | 64.00                   | 44               | 64.00                   | 60               |
| 65.70             | 14                      | 65.70            | 22                      |                  |
| 67.10             | 62                      |                  |                         |                  |
| 69.25             | 56                      | 68.95            | 36                      |                  |
| 71.85             | 36                      |                  |                         |                  |
| PbS               | 25.95                   | 1658             | 25.95                   | 335              |
|                   | 30.10                   | 22467            | 30.10                   | 517              |
|                   | 43.05                   | 1530             | 43.00                   | 265              |
|                   | 51.00                   | 893              | 50.95                   | 188              |
|                   | 53.45                   | 298              | 53.40                   | 107              |
|                   | 62.55                   | 1860             | 62.55                   | 69               |
|                   | 68.95                   | 206              | 68.80                   | 55               |
|                   | 70.95                   | 531              | 70.90                   | 108              |
|                   | 78.95                   | 226              | 78.85                   | 53               |
| CaCO <sub>3</sub> | 23.05                   | 175              | 23.05                   | 38               |
|                   | 29.40                   | 13639            | 29.40                   | 536              |
|                   | 31.45                   | 106              | 31.45                   | 18               |
|                   | 35.95                   | 283              | 35.95                   | 68               |
|                   | 39.40                   | 444              | 39.40                   | 81               |
|                   | 43.15                   | 428              | 43.15                   | 101              |
|                   | 47.10                   | 124              | 46.95                   | 25               |

|  |       |     |       |     |
|--|-------|-----|-------|-----|
|  | 47.55 | 747 | 47.55 | 93  |
|  | 48.50 | 601 | 48.50 | 111 |
|  | 56.60 | 101 | 56.55 | 19  |
|  | 57.40 | 179 | 57.40 | 56  |
|  | 58.10 | 41  |       |     |
|  | 60.70 | 101 |       |     |
|  | 61.05 | 452 | 61    | 27  |
|  | 63.10 | 47  |       |     |
|  | 64.70 | 108 | 64.70 | 32  |
|  | 65.65 | 130 | 65.65 | 27  |
|  | 69.25 | 45  |       |     |
|  | 70.25 | 56  |       |     |
|  | 72.90 | 65  | 72.90 | 18  |
|  | 73.70 | 28  |       |     |
|  | 76.30 | 39  |       |     |
|  | 77.20 | 75  |       |     |

**Table S3.** Summarization of cleavage plane and 2D exfoliation of different non-layered materials. The non-layered materials that have been exfoliated to 2D materials are highlighted in green, and the non-layered materials that should be exfoliated to access 2D materials are highlighted in yellow.

| Formula                                           | Mineral material | Cleavage plane      |                     |                     |                     |
|---------------------------------------------------|------------------|---------------------|---------------------|---------------------|---------------------|
|                                                   |                  |                     |                     |                     |                     |
| $\alpha$ -FeOOH                                   | Goethite         | (010)               | (100)               |                     |                     |
| CoOOH                                             | Heterogenite     | (0001)              |                     |                     |                     |
| TiO <sub>2</sub>                                  | Rutile           | (110)               | (100)               | (111)               |                     |
| Fe <sub>3</sub> O <sub>4</sub>                    | Magnetite        | (111)               |                     |                     |                     |
| PbS                                               | Galena           | (001)               | (111)               |                     |                     |
| ZnS                                               | Sphalerite       | (011)               |                     |                     |                     |
| NiS                                               | Millerite        | (10 <sup>1</sup> 1) | (01 <sup>1</sup> 2) |                     |                     |
| CuS                                               | Covellite        | (0001)              |                     |                     |                     |
| CaCO <sub>3</sub>                                 | Calcite          | (10 <sup>1</sup> 4) | (10 <sup>1</sup> 0) | (11 <sup>2</sup> 0) | (10 <sup>1</sup> 1) |
| ZnCO <sub>3</sub>                                 | Smithsonite      | (10 <sup>1</sup> 1) |                     |                     |                     |
| MnCO <sub>3</sub>                                 | Rhodochrosite    | (10 <sup>1</sup> 1) | (10 <sup>1</sup> 2) |                     |                     |
| FeCO <sub>3</sub>                                 | Siderite         | (10 <sup>1</sup> 1) |                     |                     |                     |
| PbCO <sub>3</sub>                                 | Cerussite        | (110)               | (021)               | (010)               | (012)               |
| Cu <sub>2</sub> CO <sub>3</sub> (OH) <sub>2</sub> | Malachite        | (201)               | (010)               |                     |                     |
| Al <sub>2</sub> O <sub>3</sub>                    | Corundum         | (0001)              | (10 <sup>1</sup> 1) |                     |                     |

|                       |             |                     |        |       |       |
|-----------------------|-------------|---------------------|--------|-------|-------|
| AlOOH                 | Diaspore    | (010)               | (110)  | (100) |       |
| AlOOH                 | Boehmite    | (010)               |        |       |       |
| TiO <sub>2</sub>      | Anatase     | (001)               | (011)  |       |       |
| MnO <sub>2</sub>      | Pyrolusite  | (110)               |        |       |       |
| SnO <sub>2</sub>      | Cassiterite | (100)               | (110)  | (111) | (011) |
| Cu <sub>2</sub> O     | Cuprite     | (111)               | (001)  |       |       |
| Cu <sub>2</sub> S     | Chalcocite  | (110)               |        |       |       |
| FeS <sub>2</sub>      | Pyrite      | (001)               | (011)  | (111) |       |
| CdS                   | Greenockite | (11 <sup>2</sup> 2) | (0001) |       |       |
| Ce(CO <sub>3</sub> )F | Bastnasite  | (10 <sup>1</sup> 0) | (0001) |       |       |
| BiOCl                 | Bismoclite  | (001)               |        |       |       |

**Table S4.** Summarization non-layered materials that are considered non-exfoliatable to 2D materials (highlighted in red).

| Formula                              | Mineral material | Cleavage plane |
|--------------------------------------|------------------|----------------|
| SiO <sub>2</sub>                     | Quartz           | No Cleavage    |
| CuO                                  | Tenorite         | No Cleavage    |
| Tl <sub>2</sub> O <sub>3</sub>       | Avicennite       | No Cleavage    |
| Sb <sub>2</sub> O <sub>4</sub>       | Clinocervantite  | No Cleavage    |
| Cr <sub>2</sub> O <sub>3</sub>       | Eskolaite        | No Cleavage    |
| Ta <sub>2</sub> O <sub>5</sub>       | Tantite          | No Cleavage    |
| WO <sub>3</sub> ·2H <sub>2</sub> O   | Meymacite        | No Cleavage    |
| WO <sub>3</sub> ·0.5H <sub>2</sub> O | Elsmoreite       | No Cleavage    |
| Sb <sub>3</sub> O <sub>6</sub> (OH)  | Stibiconite      | No Cleavage    |
| Cu <sub>7</sub> S <sub>4</sub>       | Anilite          | No Cleavage    |
| Ni <sub>3</sub> S <sub>2</sub>       | Heazlewoodite    | No Cleavage    |
| HgS                                  | Hypercinnabar    | No Cleavage    |
| Sb <sub>2</sub> S <sub>3</sub>       | Metastibnite     | No Cleavage    |
| Rh <sub>17</sub> S <sub>15</sub>     | Miassite         | No Cleavage    |
| AgBiS <sub>2</sub>                   | Schapbachite     | No Cleavage    |
| FeSe <sub>2</sub>                    | Dzharkenite      | No Cleavage    |

|                                                  |                      |                    |
|--------------------------------------------------|----------------------|--------------------|
| <b>Ag<sub>4</sub>SeS</b>                         | <b>Aguilarite</b>    | <b>No Cleavage</b> |
| <b>AgBiS<sub>2</sub></b>                         | <b>Matildite</b>     | <b>No Cleavage</b> |
| <b>Cu<sub>31</sub>S<sub>16</sub></b>             | <b>Djurleite</b>     | <b>No Cleavage</b> |
| <b>AgFe<sub>2</sub>S<sub>3</sub></b>             | <b>Argentopyrite</b> | <b>No Cleavage</b> |
| <b>TlFeS<sub>2</sub></b>                         | <b>Raguinite</b>     | <b>No Cleavage</b> |
| <b>AlTaO<sub>4</sub></b>                         | <b>Alumotantite</b>  | <b>No Cleavage</b> |
| <b>CuTeO<sub>3</sub></b>                         | <b>Balyakinite</b>   | <b>No Cleavage</b> |
| <b>AlPO<sub>4</sub></b>                          | <b>Berlinite</b>     | <b>No Cleavage</b> |
| <b>Fe(OH)<sub>3</sub></b>                        | <b>Bernalite</b>     | <b>No Cleavage</b> |
| <b>AgBr</b>                                      | <b>Bromargyrite</b>  | <b>No Cleavage</b> |
| <b>AgCl</b>                                      | <b>Chlorargyrite</b> | <b>No Cleavage</b> |
| <b>HgTe</b>                                      | <b>Coloradoite</b>   | <b>No Cleavage</b> |
| <b>Cu<sub>3</sub>As</b>                          | <b>Domeykite</b>     | <b>No Cleavage</b> |
| <b>Ca<sub>3</sub>Si<sub>2</sub>O<sub>7</sub></b> | <b>Rankinite</b>     | <b>No Cleavage</b> |
| <b>ZrSiO<sub>4</sub></b>                         | <b>Reidite</b>       | <b>No Cleavage</b> |
| <b>Cu<sub>7</sub>Te<sub>3</sub></b>              | <b>Rickardite</b>    | <b>No Cleavage</b> |
| <b>FePO<sub>4</sub></b>                          | <b>Rodolicoite</b>   | <b>No Cleavage</b> |
